# Supplementary material
Source: MDPI journal article supplement (https://www.mdpi.com/2073-4395/11/4/657)
Supplement: s1 [file s1]

# Supplementary Materials: Analysis of the Biochemical and Volatile Components of Qi-anlincha and Qiandingcha Prepared from Eurya alata Kobuski and Camellia cuspidate

Linlong Ma, Yong Yang, Dan Cao, Yanli Liu, Ziming Gong, Sezai Ercisli, Zhengfei Luo and Xiaofang Jin

**Table S2.** Analysis of the volatile component contents of the three tea samples (%)

| Volatile components             | GT         | QLC          | QDC         |
|---------------------------------|------------|--------------|-------------|
| isovaleraldehyde                | 0.15±0.01  | —**          | 0.13±0.01*  |
| 2-methylbutyraldehyde           | 0.32±0.02  | —**          | 0.12±0.01** |
| pentanal                        | 0.40±0.14  | —**          | —**         |
| hexaldehyde                     | 1.63±0.07  | 0.16±0.01**  | 0.09±0.01** |
| furfural                        | —          | —            | 0.47±0.06** |
| (E)-2-hexenal                   | —          | 0.08±0.01**  | 0.08±0.01** |
| heptanal                        | 2.26±0.08  | 0.79±0.02**  | 0.27±0.01** |
| benzaldehyde                    | 0.19±0.03  | 0.92±0.06**  | 0.71±0.09** |
| octanal                         | 0.50±0.09  | 0.32±0.02**  | —**         |
| (E)-2-heptenal                  | 0.08±0.01  | —**          | —**         |
| (E,E)-2,4-heptadienal           | —          | 0.59±0.01**  | 0.38±0.02** |
| phenylacetaldehyde              | 0.25±0.02  | 0.44±0.01*   | 1.20±0.12** |
| 2,6-dimethyl-5-heptenal         | 0.11±0.02  | —**          | —**         |
| nonanal                         | 6.87±0.71  | 4.39±0.17**  | —**         |
| safranal                        | 0.49±0.02  | —**          | —**         |
| (E)-2-nonenal                   | 0.19±0.02  | 0.41±0.01**  | 0.21±0.01*  |
| capraldehyde                    | 1.98±0.21  | 1.21±0.05**  | 0.28±0.01** |
| 3-heptylacrolein                | —          | 0.30±0.02**  | 0.13±0.03** |
| citral                          | —          | 0.48±0.05**  | —           |
| β-cyclocitral                   | 0.38±0.01  | 1.14±0.03**  | 0.64±0.01** |
| 2-undecenal                     | —          | 0.21±0.01**  | —           |
| (Z)-3,7-dimethylocta-2,6-dienal | —          | 0.37±0.01**  | —           |
| 2-phenyl-2-butenal              | —          | —            | 0.25±0.04** |
| undecanal                       | —          | 0.17±0.01**  | —           |
| Total aldehydes                 | 15.79±0.92 | 11.99±0.31** | 4.94±0.37** |
| benzyl alcohol                  | 0.24±0.05  | —**          | —**         |
| α-terpineol                     | 0.13±0.13  | 1.81±0.12**  | 4.18±0.13** |
| nerol                           | —          | 0.56±0.05**  | 1.22±0.06** |
| geraniol                        | 7.53±0.18  | 10.46±0.42** | 3.41±0.15** |
| (-)-terpinen-4-ol               | —          | —            | 7.31±0.09** |
| T-cadinol                       | —          | 0.45±0.04**  | —           |
| nerolidol                       | —          | 1.30±0.03**  | 0.34±0.01** |
| (2Z)-2-octene-1-ol              | 0.27±0.01  | —**          | —**         |

|                                          |            |              |              |
|------------------------------------------|------------|--------------|--------------|
| leaf alcohol                             | 0.43±0.04  | —**          | —**          |
| linalool                                 | 6.18±0.39  | 11.19±0.23** | 28.28±0.25** |
| 3,7-dimethyl-6-octen-3-ol                | -          | -            | 7.89±0.12**  |
| phenethyl alcohol                        | 0.42±0.04  | 0.10±0.04**  | —**          |
| cis-linalool oxide                       | 0.29±0.01  | 0.28±0.14    | 0.23±0.01    |
| Total alcohols                           | 15.50±0.78 | 26.15±0.07** | 52.87±0.61** |
| cis-jasmone                              | -          | 5.90±0.28**  | 1.49±0.08**  |
| β-ionone                                 | 0.54±0.12  | 1.02±0.04**  | 0.43±0.05    |
| geranylacetone                           | 0.79±0.17  | 0.74±0.02    | 0.31±0.03**  |
| (Z)-7-decen-5-olide                      | -          | 0.53±0.04**  | -            |
| 2,3-octadione                            | 0.60±0.04  | —**          | —**          |
| 3-hexen-2-one                            | -          | -            | 0.07±0.05*   |
| methyl heptenone                         | 0.39±0.01  | 0.08±0.02**  | 0.11±0.01**  |
| Total ketones                            | 2.33±0.33  | 8.27±0.21**  | 2.42±0.21    |
| (E)-2-methyl-1,3-pentadiene              | -          | -            | 0.12±0.01**  |
| α-phellandrene                           | -          | 0.39±0.03**  | 1.25±0.02**  |
| myrcene                                  | -          | 1.22±0.06**  | 1.83±0.11**  |
| α-terpinene                              | 0.10±0.01  | 0.58±0.10**  | 3.64±0.10**  |
| (+)-dipentene                            | 0.37±0.02  | 2.42±0.39**  | 4.63±0.38**  |
| (E)-β-ocimene                            | 0.27±0.01  | 1.13±0.12**  | 1.39±0.09**  |
| 3-carene                                 | 0.98±0.02  | —**          | —**          |
| α-ocimene                                | -          | 1.88±0.20**  | 2.55±0.16**  |
| γ-terpinene                              | -          | 0.80±0.07**  | 5.19±0.43**  |
| terpinolene                              | -          | 1.42±0.19**  | 3.24±0.19**  |
| (3E,5E)-2,6-dimethyl-1,3,5,7-octatetrene | -          | 0.46±0.01**  | 2.32±0.01**  |
| (3E)-4,8-dimethylnona-1,3,7-triene       | -          | 3.65±0.09**  | -            |
| α-farnesene                              | -          | 1.39±0.12**  | 0.47±0.07**  |
| β-caryophyllene                          | -          | 0.85±0.01**  | -            |
| α-cedrene                                | 0.66±0.17  | —**          | —**          |
| α-cubebene                               | 1.25±0.06  | —**          | —**          |
| δ-cadinene                               | 4.19±0.57  | 0.35±0.03**  | 0.32±0.04**  |
| styrene                                  | 0.33±0.02  | —**          | 0.15±0.01**  |
| Total alkenes                            | 8.15±0.71  | 16.55±0.94** | 27.09±1.34** |
| methyl hexanoate                         | 0.20±0.02  | —**          | —**          |
| methyl benzoate                          | -          | -            | 0.37±0.03**  |
| (E)-hex-3-enyl butyrate                  | 10.72±0.47 | 1.26±0.06**  | 0.52±0.01**  |
| methyl salicylate                        | 2.53±0.09  | 1.03±0.10**  | 1.61±0.17**  |
| allyl-2-ethylbutyrate                    | 0.59±0.03  | —**          | —**          |
| (Z)-3-cis-3-hexenyl isovalerate          | 5.41±0.40  | 0.58±0.05**  | 0.23±0.01**  |
| cis-3-hexenyl benzoate                   | -          | 0.42±0.03**  | 0.10±0.01**  |
| geranyl acetate                          | -          | 2.64±0.49**  | -            |
| caproicacidhexneylester                  | 20.88±0.28 | 0.41±0.04**  | 0.31±0.01**  |

|                                               |            |              |             |
|-----------------------------------------------|------------|--------------|-------------|
| (Z,Z)-3-hexenoicacid-3-hexenylester           | 1.28±0.14  | –**          | –**         |
| Total esters                                  | 41.59±1.20 | 6.35±0.78**  | 3.14±0.21** |
| ethylbenzene                                  | 0.68±0.07  | –**          | –**         |
| <i>p</i> -xylene                              | 1.36±0.06  | –**          | –**         |
| <i>m</i> -xylene                              | 0.80±0.08  | –**          | –**         |
| toluene                                       | 1.20±0.02  | 0.04±0.01**  | 0.07±0.01** |
| <i>p</i> -cymene                              | –          | 0.26±0.02*   | 2.77±0.26** |
| <i>alpha</i> , <i>p</i> -dimethylstyrene      | –          | –            | 1.29±0.02** |
| naphthalene                                   | 1.02±0.10  | 1.07±0.04    | –**         |
| 2-methylnaphthalene                           | 0.26±0.05  | –**          | –**         |
| 1,1,6-trimethyl-1,2-dihydronaphthalene        | –          | 0.39±0.03**  | 0.20±0.03** |
| Total aromatic hydrocarbons                   | 5.31±0.04  | 1.77±0.02**  | 4.33±0.26** |
| dimethyl sulfide                              | 2.81±0.47  | 21.13±0.58** | 0.24±0.14** |
| dodecane                                      | –          | 0.21±0.01**  | 0.21±0.01** |
| hexadecane                                    | –          | 0.46±0.04**  | 0.45±0.08** |
| tetradecane                                   | –          | 0.41±0.01**  | 0.35±0.04** |
| indole                                        | 0.75±0.01  | 1.88±0.03**  | –**         |
| thymol                                        | –          | –            | 0.45±0.02** |
| 2,6-di-tert-butyl-p-benzoquinone              | 0.36±0.09  | –**          | –**         |
| 2,4-di-tert-butylphenol                       | 1.17±0.36  | 0.98±0.14    | –*          |
| nonanoic acid                                 | –          | 0.28±0.02*   | 0.16±0.04** |
| nerol oxide                                   | –          | –            | 0.56±0.02** |
| limetol                                       | –          | –            | 0.06±0.01** |
| 2-ethenyl-1,1-dimethyl-3-methylenecyclohexane | –          | –            | 0.37±0.04** |
| acrylic acid                                  | –          | 1.60±0.24**  | –           |
| Other components                              | 5.09±0.02  | 26.94±0.78** | 2.84±0.01** |
